# Supplementary material for: Influence of Different Glycoproteins and of the Virion Core on SERINC5 Antiviral Activity
Source: MDPI journal article supplement (doi:10.3390/v13071279), 2021-06-30
Supplement: s1 [file s1]

## Supplementary Material

**Table S1.** Expression plasmids used in this study.

| Glycoprotein                    | Plasmid        | Source                                                                      | Addgene Number | Reference |
|---------------------------------|----------------|-----------------------------------------------------------------------------|----------------|-----------|
| ALV EnvA                        | pCB6-EnvA      |                                                                             | 74420          | [1]       |
| LCMV Arm53b                     | pCMV WT GP     | Juan de la Torre<br>(Scripps Research)                                      |                | [2]       |
| C-term. truncated<br>SARS CoV S | pKS-SARS-SΔ19  | Shuetsh Fukushi<br>(National Institute<br>of Infectious<br>Diseases, Japan) |                | [3]       |
| M-PMV Env                       | pTMT           | Eric Hunter<br>(Emory Univ.)                                                |                | [4]       |
| HTLV-1 Env                      | pV1/HTLV       | Paul Bieniasz<br>(Rockefeller Univ.)                                        |                | [5]       |
| MLV Eco Env                     | pHCMV-EcoEnv   | Miguel Sena-<br>Esteves<br>(Univ. of Mass.<br>Med. School)                  | 15802          | [6]       |
| MLV Ampho Env                   | pHCMV-AmphoEnv | Miguel Sena-<br>Esteves<br>(Univ. of Mass.<br>Med. School)                  | 15799          | [6]       |
| HERV-K Env                      | pCAGGS-HERV-K  | Sean Whelan<br>(Harvard Univ.)                                              |                | [7]       |
| PIV5 F                          | pCAGGS-PIV5 F  | Sean Whelan<br>(Harvard Univ.)                                              |                | [8]       |
| PIV5 HN                         | pCAGGS-PIV5 HN | Sean Whelan<br>(Harvard Univ.)                                              |                | [8]       |

|                                                      |                 |                                                                      |       |      |
|------------------------------------------------------|-----------------|----------------------------------------------------------------------|-------|------|
| Flu HA (H7/Kp<br>Rostock)                            | pFPV-HA         | John Olsen<br>(Univ. of North<br>Carolina Chapel<br>Hill [Emeritus]) |       | [9]  |
| Flu NA (H1N1;<br>A/PR/8/34)                          | pEF6-NA         | John Olsen<br>(Univ. of North<br>Carolina Chapel<br>Hill [Emeritus]) |       | [10] |
| Flu M2                                               | pCB6-M2         | John Olsen<br>(Univ. of North<br>Carolina Chapel<br>Hill [Emeritus]) |       | [11] |
| C-term. truncated<br>Measles F                       | pCG-FΔ30        | Els Verhoyen<br>(Ecole Normale<br>Supérieure de Lyon)                |       | [12] |
| C-term. truncated<br>Measles H                       | pCG-HΔ24        | Els Verhoyen<br>(Ecole Normale<br>Supérieure de Lyon)                |       | [12] |
| RD114A Env with<br>Ampho MLV Env<br>cytoplasmic tail | phCMV-RD114/TR  | François-Loïc<br>Cosset<br>(Ecole Normale<br>Supérieure de Lyon)     |       | [13] |
| VSV G                                                | pMD2.G          | Didier Trono<br>(Ecole<br>Polytechnique<br>Fédérale de<br>Lausanne)  | 12259 |      |
| Rabies G                                             | pLTR-RVG        | Jakob Reiser<br>(US FDA)                                             | 17577 | [14] |
| Mayinga EBOV GP                                      | pCB6-Zaire EBOV | Graham Simmons<br>(Univ. of California,<br>San Francisco)            |       | [15] |

|                                      |                                        |                                                           |        |           |
|--------------------------------------|----------------------------------------|-----------------------------------------------------------|--------|-----------|
| Sudan Ebola GP                       | pCB6-Sudan EBOV                        | Graham Simmons<br>(Univ. of California,<br>San Francisco) |        | [15]      |
| Reston Ebola GP                      | pCB6-Reston EBOV                       | Graham Simmons<br>(Univ. of California,<br>San Francisco) |        | [15]      |
| Ravn MARV GP                         | pCAGGS-MARV                            | Graham Simmons<br>(Univ. of California,<br>San Francisco) |        | [16]      |
| Bundibugyo Ebola<br>GP               | pCAGGS-BDBV                            | Graham Simmons<br>(Univ. of California,<br>San Francisco) |        | [17]      |
| Tai Forest Ebola GP                  | pcDNA6-TAFV                            | Graham Simmons<br>(Univ. of California,<br>San Francisco) |        | [17]      |
| Lloviu Ebola GP                      | pCAGGS-LLOV                            | Graham Simmons<br>(Univ. of California,<br>San Francisco) |        | [17]      |
| Makona EBOV GP                       | pGL4.23 WT 2014<br>EBOV $\Delta$ Muc   |                                                           | 86021  | [18]      |
| A82V Makona EBOV<br>GP               | pGL4.23 A82V 2014<br>EBOV $\Delta$ Muc |                                                           | 86022  | [18]      |
| C-term. truncated<br>NL4.3 Env (C/O) | pcDNA-NL4.3 Env<br>$\Delta$ CT         |                                                           | 139285 | This work |
| GPI anchored TVA                     | pCMMP-TVA800                           | Edward Callaway<br>(Salk Institute)                       | 15778  | [19]      |
| murine CAT1                          | pBABE-puro-mCAT1                       |                                                           |        | [20]      |

---

1. Gilbert, J.M.; Bates, P.; Varmus, H.E.; White, J.M. The Receptor for the Subgroup A Avian Leukosis-Sarcoma Viruses Binds to Subgroup A but Not to Subgroup C Envelope Glycoprotein. *J. Virol.* **1994**, *68*, 5623–5628.

2. Saunders, A.A.; Ting, J.P.C.; Meisner, J.; Neuman, B.W.; Perez, M.; de la Torre, J.C.; Buchmeier, M.J. Mapping the Landscape of the Lymphocytic Choriomeningitis Virus Stable Signal Peptide Reveals Novel Functional Domains. *J. Virol.* **2007**, *81*, 5649–5657.
3. Fukushi, S.; Mizutani, T.; Saijo, M.; Matsuyama, S.; Miyajima, N.; Taguchi, F.; Itamura, S.; Kurane, I.; Morikawa, S. Vesicular Stomatitis Virus Pseudotyped with Severe Acute Respiratory Syndrome Coronavirus Spike Protein. *Journal of General Virology* 2005, *86*, 2269–2274.
4. Song, C.; Dubay, S.R.; Hunter, E. A Tyrosine Motif in the Cytoplasmic Domain of Mason-Pfizer Monkey Virus Is Essential for the Incorporation of Glycoprotein into Virions. *J. Virol.* **2003**, *77*, 5192–5200.
5. Cowan, S.; Hatzioannou, T.; Cunningham, T.; Muesing, M.A.; Gottlinger, H.G.; Bieniasz, P.D. Cellular Inhibitors with Fv1-like Activity Restrict Human and Simian Immunodeficiency Virus Tropism. *Proceedings of the National Academy of Sciences* 2002, *99*, 11914–11919.
6. Sena-Esteves, M.; Tebbets, J.C.; Steffens, S.; Crombleholme, T.; Flake, A.W. Optimized Large-Scale Production of High Titer Lentivirus Vector Pseudotypes. *J. Virol. Methods* **2004**, *122*, 131–139.
7. Robinson, L.R.; Whelan, S.P.J. Infectious Entry Pathway Mediated by the Human Endogenous Retrovirus K Envelope Protein. *J. Virol.* **2016**, *90*, 3640–3649.
8. Paterson, R.G.; Russell, C.J.; Lamb, R.A. Fusion Protein of the Paramyxovirus SV5: Destabilizing and Stabilizing Mutants of Fusion Activation. *Virology* **2000**, *270*, 17–30.
9. Hatzioannou, T.; Valsesia-Wittmann, S.; Russell, S.J.; Cosset, F.-L. Incorporation of Fowl Plague Virus Hemagglutinin into Murine Leukemia Virus Particles and Analysis of the Infectivity of the Pseudotyped Retroviruses. *Journal of Virology* 1998, *72*, 5313–5317.
10. McKay, T.; Patel, M.; Pickles, R.J.; Johnson, L.G.; Olsen, J.C. Influenza M2 Envelope Protein Augments Avian Influenza Hemagglutinin Pseudotyping of Lentiviral Vectors. *Gene Ther.* **2006**, *13*, 715–724.
11. Henkel, J.R.; Weisz, O.A. Influenza Virus M2 Protein Slows Traffic along the Secretory Pathway. pH Perturbation of Acidified Compartments Affects Early Golgi Transport Steps. *J. Biol. Chem.* **1998**, *273*, 6518–6524.
12. Moll, M.; Klenk, H.-D.; Maisner, A. Importance of the Cytoplasmic Tails of the Measles Virus Glycoproteins for Fusogenic Activity and the Generation of Recombinant Measles Viruses. *Journal of Virology* 2002, *76*, 7174–7186.
13. Sandrin, V.; Boson, B.; Salmon, P.; Gay, W.; Nègre, D.; Le Grand, R.; Trono, D.; Cosset, F.-L. Lentiviral Vectors Pseudotyped with a Modified RD114 Envelope Glycoprotein Show Increased Stability in Sera and Augmented Transduction of Primary Lymphocytes and CD34+ Cells Derived from Human and Nonhuman Primates. *Blood* **2002**, *100*, 823–832.
14. Mochizuki, H.; Schwartz, J.P.; Tanaka, K.; Brady, R.O.; Reiser, J. High-Titer Human Immunodeficiency Virus Type 1-Based Vector Systems for Gene Delivery into Nondividing Cells. *Journal of Virology* 1998, *72*, 8873–8883.
15. Simmons, G.; Wool-Lewis, R.J.; Baribaud, F.; Netter, R.C.; Bates, P. Ebola Virus Glycoproteins Induce Global Surface Protein down-Modulation and Loss of Cell Adherence. *J. Virol.* **2002**, *76*, 2518–2528.
16. Salvador, B.; Sexton, N.R.; Carrion, R.; Nunneley, J.; Patterson, J.L.; Steffen, I.; Lu, K.; Muench, M.O.; Lembo, D.; Simmons, G. Filoviruses Utilize Glycosaminoglycans for Their Attachment to Target Cells. *Journal of Virology* 2013, *87*, 3295–3304.
17. Wrensch, F.; Karsten, C.B.; Gnirß, K.; Hoffmann, M.; Lu, K.; Takada, A.; Winkler, M.; Simmons, G.; Pöhlmann, S. Interferon-Induced Transmembrane Protein-Mediated Inhibition of Host Cell Entry of Ebolaviruses. *Journal of Infectious Diseases* 2015, *212*, S210–S218.
18. Diehl, W.E.; Lin, A.E.; Grubaugh, N.D.; Carvalho, L.M.; Kim, K.; Kyawe, P.P.; McCauley, S.M.; Donnard, E.; Kucukural, A.; McDonel, P.; et al. Ebola Virus Glycoprotein with Increased Infectivity

- Dominated the 2013-2016 Epidemic. *Cell* **2016**, *167*, 1088–1098.e6.
19. Wickersham, I.R.; Lyon, D.C.; Barnard, R.J.O.; Mori, T.; Finke, S.; Conzelmann, K.-K.; Young, J.A.T.; Callaway, E.M. Monosynaptic Restriction of Transsynaptic Tracing from Single, Genetically Targeted Neurons. *Neuron* **2007**, *53*, 639–647.
  20. Pizzato, M. MLV Glycosylated-Gag Is an Infectivity Factor That Rescues Nef-Deficient HIV-1. *Proc. Natl. Acad. Sci. U. S. A.* **2010**, *107*, 9364–9369.
